# Supplementary material for: Leveraging Clinical Decision Support System Tools for Childhood Overweight/Obesity Management
Source: Research Square preprint supplement (doi:10.21203/rs.3.rs-7564927/v1), 2025-10-03

**Supplemental Materials:** Structured guidelines for the recommended comorbidity screening based on BMI categories triggered by the OPA system, along with recommended follow-up actions for abnormal results, to ensure effective treatment.


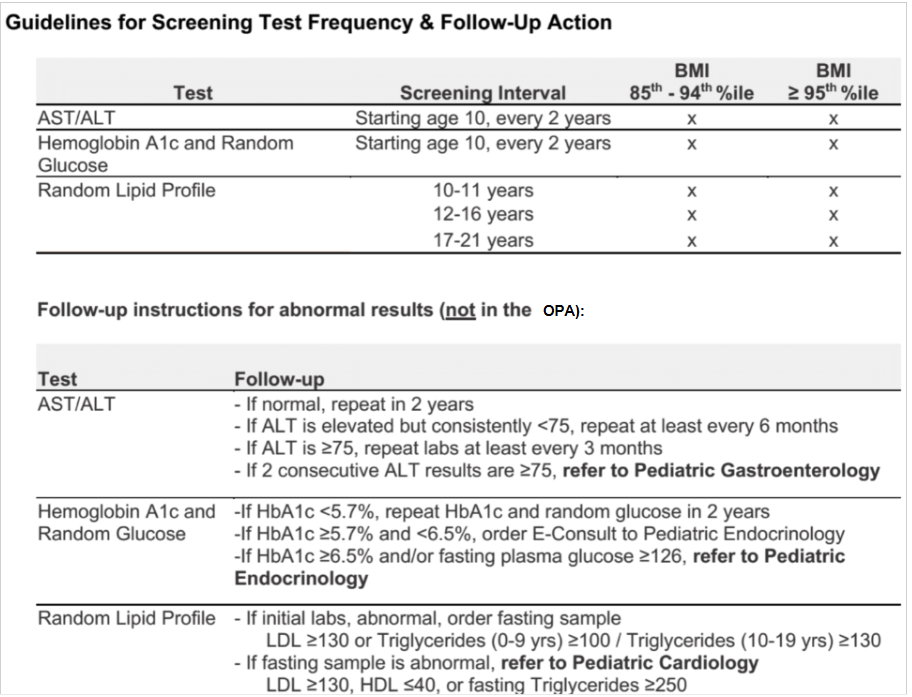

Supplement: Supplementary file 1 [file 2cf8a93815caf6d1cb47ebac.docx]
